# Supplementary material
Source: PubMed Central journal article supplement (PMC3078167)
Supplement: NIHMS274085-supplement-01.pdf [file NIHMS274085-supplement-01.pdf]

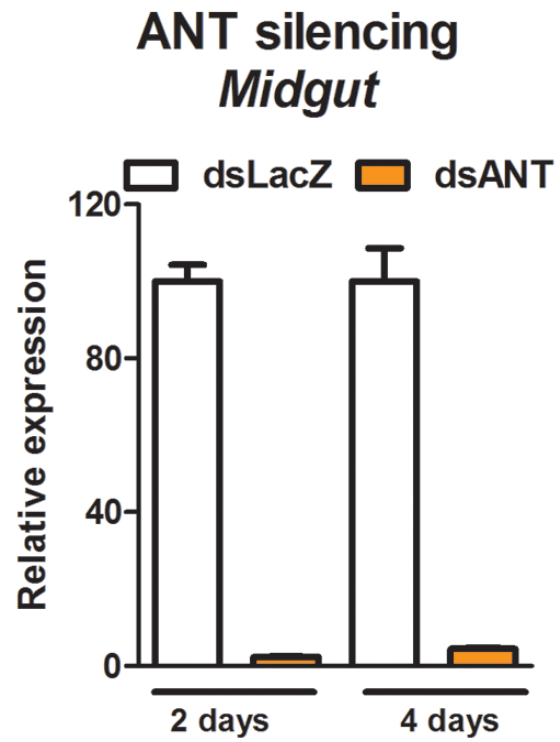

**Figure S1. Silencing efficiency of systemic injection of adenine nucleotide translocator (ANT) double-stranded RNA.**
